# Supplementary material for: Development and Internal Validation of a Discrete Event Simulation Model of Diabetic Kidney Disease Using CREDENCE Trial Data
Source: Springer Nature journal article supplement (doi:10.1007/s13300-020-00923-w), 2020-09-15
Supplement: MOESM1 [file 18381752]

**Electronic Supplementary Material 1**

**Development and Internal Validation of a Discrete Event Simulation Model of Diabetic  
Kidney Disease Using CREDENCE Trial Data**

**Journal: Diabetes Therapy**

Michael Willis<sup>1</sup>

Christian Asseburg<sup>2</sup>

April Slee<sup>3</sup>

Andreas Nilsson<sup>1</sup>

Cheryl Neslusan<sup>4</sup>

<sup>1</sup>The Swedish Institute for Health Economics, Lund, Sweden

<sup>2</sup>ESiOR Oy, Kuopio, Finland

<sup>3</sup>Axio Research Inc, Seattle, WA, USA

<sup>4</sup>Janssen Scientific Affairs, LLC, Titusville, NJ, USA

**Corresponding author:**

Michael Willis, PhD

The Swedish Institute for Health Economics

Box 2017

SE-220 02 Lund

Email: mw@ihe.se

**Table S1. Baseline Patient Characteristics, by Study Arm and Overall**

|                       | Units                      | Canagliflozin Arm<br>(N = 2,202) |         |                    | Placebo Arm<br>(N = 2,199) |         |       | Overall<br>(N = 4,401) |         |       |
|-----------------------|----------------------------|----------------------------------|---------|--------------------|----------------------------|---------|-------|------------------------|---------|-------|
|                       |                            | Mean                             | Std Dev | N                  | Mean                       | Std Dev | N     | Mean                   | Std Dev | N     |
| Age                   | Years                      | 62.88                            | 9.17    | 2,202              | 63.16                      | 9.23    | 2,199 | 63.02                  | 9.20    | 4,401 |
| Age at T2DM diagnosis | Years                      | 47.33                            | 11.06   | 2,202              | 47.14                      | 11.12   | 2,199 | 47.24                  | 11.09   | 4,401 |
| Female                | Proportion                 | 0.35                             | 0.48    | 2,202              | 0.33                       | 0.47    | 2,199 | 0.34                   | 0.47    | 4,401 |
| Smoking status        | Proportion                 | 0.16                             | 0.36    | 2,202              | 0.14                       | 0.34    | 2,199 | 0.15                   | 0.35    | 4,401 |
| T2DM duration         | Years                      | 15.55                            | 8.68    | 2,202              | 16.02                      | 8.58    | 2,199 | 15.78                  | 8.63    | 4,401 |
| eGFR                  | mL/min/1.73 m <sup>2</sup> | 56.35                            | 18.17   | 2,201 <sup>a</sup> | 56.01                      | 18.33   | 2,199 | 56.18                  | 18.24   | 4,400 |
| ln(UACR)              | mg/dL                      | 6.77                             | 1.02    | 2,202              | 6.81                       | 1.01    | 2,199 | 6.79                   | 1.02    | 4,401 |
| MI Hx                 | Proportion                 | 0.10                             | 0.30    | 2,202              | 0.10                       | 0.30    | 2,199 | 0.10                   | 0.30    | 4,401 |
| Stroke Hx             | Proportion                 | 0.10                             | 0.30    | 2,202              | 0.11                       | 0.31    | 2,199 | 0.10                   | 0.31    | 4,401 |
| HF Hx                 | Proportion                 | 0.15                             | 0.36    | 2,202              | 0.15                       | 0.35    | 2,199 | 0.15                   | 0.36    | 4,401 |

<sup>a</sup>One missing value

eGFR estimated glomerular filtration rate, HF heart failure, Hx history, MI myocardial infarction, T2DM type 2 diabetes mellitus, UACR urine albumin-to-creatinine ratio

**Table S2. Explanatory Covariates**

| Variable                                   | Dialysis | DoSCr | Nonfatal MI | Nonfatal Stroke | HHF | ACM | CV Death | ESKD |
|--------------------------------------------|----------|-------|-------------|-----------------|-----|-----|----------|------|
| Age at diagnosis                           | x        | x     | x           | x               | x   | x   | x        | x    |
| Diabetes duration                          |          |       |             |                 |     |     | x        |      |
| Time (weeks)                               |          |       |             |                 |     |     |          |      |
| Female                                     | x        | x     | x           | x               | x   | x   | x        | x    |
| Smoking                                    | x        | x     | x           | x               | x   | x   |          | x    |
| MI Hx                                      | x        | x     | x           | x               | x   | x   |          | x    |
| MI Hx <sup>a</sup>                         |          |       |             |                 |     | x   | x        |      |
| Stroke Hx                                  | x        | x     | x           | x               | x   | x   |          | x    |
| Stroke Hx <sup>a</sup>                     |          |       |             |                 |     | x   | x        |      |
| HF Hx                                      | x        | x     | x           | x               | x   | x   |          | x    |
| HF Hx <sup>a</sup>                         |          |       |             |                 |     | x   | x        |      |
| eGFR                                       | x        | x     |             |                 |     |     |          | x    |
| eGFR ≥60                                   |          |       | x           | x               | x   |     |          |      |
| eGFR <60, ≥45                              |          |       | x           | x               | x   |     |          |      |
| eGFR <60, ≥45 <sup>a</sup>                 |          |       |             |                 |     |     | x        |      |
| eGFR <45, ≥30                              |          |       | x           | x               | x   |     |          |      |
| eGFR <45, ≥30 <sup>a</sup>                 |          |       |             |                 |     |     | x        |      |
| eGFR <30                                   |          |       | x           | x               | x   |     |          |      |
| eGFR <15 <sup>a</sup>                      |          |       |             |                 |     | x   |          |      |
| ln(UACR)                                   | x        | x     |             |                 |     |     |          | x    |
| UACR >300                                  |          |       | x           | x               | x   |     |          |      |
| UACR >300 <sup>a</sup>                     |          |       |             |                 |     |     | x        |      |
| UACR ≤300                                  |          |       | x           | x               | x   |     |          |      |
| Start of maintenance dialysis <sup>a</sup> |          |       |             |                 |     | x   | x        |      |
| First-year indicator                       | x        | x     |             |                 |     |     |          | x    |
| Canagliflozin                              |          |       |             |                 |     |     | x        |      |

<sup>a</sup>Time-varying

ACM all-cause mortality, CV cardiovascular, DoSCr doubling of serum creatinine, eGFR estimated glomerular filtration rate, ESKD end-stage kidney disease, HF heart failure, HHF hospitalization for heart failure, Hx history, MI myocardial infarction, UACR urine albumin:creatinine ratio

**Table S3. Correlation Matrices for Baseline Patient Characteristics - Overall**

| <b>Overall</b>        | <b>Age</b> | <b>Female</b> | <b>Smoking Status</b> | <b>T2DM Duration</b> | <b>eGFR</b> | <b>ln(UACR)</b> | <b>MI Hx</b> | <b>Stroke Hx</b> | <b>HF Hx</b> | <b>Age at T2DM Diagnosis</b> |
|-----------------------|------------|---------------|-----------------------|----------------------|-------------|-----------------|--------------|------------------|--------------|------------------------------|
| Age                   | 1.000      |               |                       |                      |             |                 |              |                  |              |                              |
| Female                | -0.007     | 1.000         |                       |                      |             |                 |              |                  |              |                              |
| Smoking status        | -0.087     | -0.114        | 1.000                 |                      |             |                 |              |                  |              |                              |
| T2DM duration         | 0.227      | 0.034         | -0.060                | 1.000                |             |                 |              |                  |              |                              |
| eGFR                  | -0.144     | 0.007         | 0.079                 | -0.131               | 1.000       |                 |              |                  |              |                              |
| ln(UACR)              | -0.125     | 0.018         | 0.023                 | 0.020                | -0.108      | 1.000           |              |                  |              |                              |
| MI Hx                 | 0.078      | -0.067        | -0.005                | 0.020                | -0.050      | 0.006           | 1.000        |                  |              |                              |
| Stroke Hx             | 0.064      | 0.001         | 0.007                 | 0.023                | -0.010      | 0.000           | 0.032        | 1.000            |              |                              |
| HF Hx                 | 0.097      | 0.047         | -0.037                | -0.040               | 0.018       | 0.021           | 0.125        | 0.049            | 1.000        |                              |
| Age at T2DM diagnosis | 0.653      | -0.032        | -0.025                | -0.590               | -0.018      | -0.119          | 0.050        | 0.035            | 0.112        | 1.000                        |

eGFR estimated glomerular filtration rate, HF heart failure, Hx history, MI myocardial infarction, UACR urine albumin:creatinine ratio

**Table S4. Number of Events in CREDENCE for the Placebo Arm**

| Outcome                      | Subjects in the Placebo Arm | Number of Events |
|------------------------------|-----------------------------|------------------|
| Start of dialysis            | 2,012                       | 100              |
| Doubling of serum creatinine | 2,013                       | 186              |
| Nonfatal MI                  | 2,199                       | 81               |
| Nonfatal stroke              | 2,199                       | 65               |
| HHF                          | 2,199                       | 129              |
| Death                        | 2,199                       | 201              |
| CV cause of death            | 201                         | 140              |

CREDENCE Canagliflozin and Renal Endpoints in Diabetes with Established Nephropathy Clinical Evaluation, HHF hospitalization for heart failure, MI myocardial infarction

**Table S5. Covariance Matrix for Start of Dialysis Regression Coefficients**

|                      | Age at Diagnosis | Female    | Smoking   | MI Hx     | Stroke Hx | HF Hx     | ln(UACR)  | eGFR      | First-year Indicator | Intercept | Shape Parameter |
|----------------------|------------------|-----------|-----------|-----------|-----------|-----------|-----------|-----------|----------------------|-----------|-----------------|
| Age at diagnosis     | 9.47E-05         | -4.32E-05 | 2.24E-05  | -7.45E-04 | -3.07E-05 | -5.84E-04 | 2.89E-04  | 1.34E-05  | 2.00E-04             | -1.70E-02 | 2.44E-03        |
| Female               | -4.32E-05        | 4.99E-02  | 7.90E-03  | 1.17E-02  | 7.17E-03  | -4.01E-03 | -4.02E-03 | 7.46E-05  | 7.69E-03             | -1.49E-02 | 6.89E-03        |
| Smoking              | 2.24E-05         | 7.90E-03  | 1.62E-01  | 1.13E-02  | 7.60E-03  | -1.43E-03 | 5.25E-03  | 2.14E-04  | 1.46E-02             | -1.17E-01 | 1.20E-02        |
| MI Hx                | -7.45E-04        | 1.17E-02  | 1.13E-02  | 1.45E-01  | -4.55E-03 | 1.17E-02  | -8.04E-03 | -1.05E-04 | 1.06E-02             | 1.67E-01  | -2.04E-02       |
| Stroke Hx            | -3.07E-05        | 7.17E-03  | 7.60E-03  | -4.55E-03 | 8.63E-02  | 2.44E-02  | -3.13E-03 | 1.94E-04  | 2.35E-02             | -6.54E-02 | 1.48E-02        |
| HF Hx                | -5.84E-04        | -4.01E-03 | -1.43E-03 | 1.17E-02  | 2.44E-02  | 8.67E-02  | -4.53E-03 | -3.67E-04 | 9.93E-03             | 1.67E-02  | 1.01E-02        |
| ln(UACR)             | 2.89E-04         | -4.02E-03 | 5.25E-03  | -8.04E-03 | -3.13E-03 | -4.53E-03 | 2.33E-02  | 2.18E-04  | -1.29E-03            | -2.11E-01 | 2.69E-03        |
| eGFR                 | 1.34E-05         | 7.46E-05  | 2.14E-04  | -1.05E-04 | 1.94E-04  | -3.67E-04 | 2.18E-04  | 9.00E-05  | 2.36E-04             | -6.89E-03 | 2.41E-04        |
| First-year indicator | 2.00E-04         | 7.69E-03  | 1.46E-02  | 1.06E-02  | 2.35E-02  | 9.93E-03  | -1.29E-03 | 2.36E-04  | 5.87E-02             | -1.96E-01 | 3.96E-02        |
| Intercept            | -1.70E-02        | -1.49E-02 | -1.17E-01 | 1.67E-01  | -6.54E-02 | 1.67E-02  | -2.11E-01 | -6.89E-03 | -1.96E-01            | 7.60E+00  | -1.17E+00       |
| Shape parameter      | 2.44E-03         | 6.89E-03  | 1.20E-02  | -2.04E-02 | 1.48E-02  | 1.01E-02  | 2.69E-03  | 2.41E-04  | 3.96E-02             | -1.17E+00 | 2.42E-01        |

eGFR estimated glomerular filtration rate, HF heart failure, Hx history, MI myocardial infarction, UACR urine albumin:creatinine ratio

**Table S6. Covariance Matrix for Doubling of Serum Creatinine Regression Coefficients**

|                      | Age at Diagnosis | Female    | Smoking   | MI Hx     | Stroke Hx | HF Hx     | First-year Indicator | ln(UACR)  | eGFR      | Intercept | Shape Parameter |
|----------------------|------------------|-----------|-----------|-----------|-----------|-----------|----------------------|-----------|-----------|-----------|-----------------|
| Age at diagnosis     | 5.67E-05         | 6.64E-05  | 4.29E-05  | -3.73E-04 | 1.30E-04  | -3.37E-04 | 1.17E-04             | 1.99E-04  | 3.07E-06  | -1.05E-02 | 9.45E-04        |
| Female               | 6.64E-05         | 2.37E-02  | 4.36E-03  | 6.99E-03  | -3.02E-03 | -2.97E-04 | 1.24E-03             | -3.06E-03 | -3.83E-05 | 3.36E-03  | 1.56E-03        |
| Smoking              | 4.29E-05         | 4.36E-03  | 5.82E-02  | 7.46E-04  | 9.33E-04  | -8.58E-04 | 3.39E-03             | -3.70E-04 | 9.17E-05  | -4.42E-02 | 4.90E-03        |
| MI Hx                | -3.73E-04        | 6.99E-03  | 7.46E-04  | 6.25E-02  | -1.13E-03 | 7.98E-03  | 7.00E-03             | -8.36E-03 | 2.06E-05  | 1.12E-01  | -6.27E-03       |
| Stroke Hx            | 1.30E-04         | -3.02E-03 | 9.33E-04  | -1.13E-03 | 7.22E-02  | 1.45E-03  | 6.46E-04             | 3.24E-04  | 7.20E-05  | -4.36E-02 | 4.08E-03        |
| HF Hx                | -3.37E-04        | -2.97E-04 | -8.58E-04 | 7.98E-03  | 1.45E-03  | 5.03E-02  | 6.03E-04             | -2.91E-03 | 1.14E-05  | 6.90E-02  | -5.76E-03       |
| First-year indicator | 1.17E-04         | 1.24E-03  | 3.39E-03  | 7.00E-03  | 6.46E-04  | 6.03E-04  | 2.68E-02             | -1.97E-03 | 8.51E-05  | -5.39E-02 | 7.63E-03        |
| ln(UACR)             | 1.99E-04         | -3.06E-03 | -3.70E-04 | -8.36E-03 | 3.24E-04  | -2.91E-03 | -1.97E-03            | 1.38E-02  | 4.54E-05  | -1.28E-01 | 1.91E-03        |
| eGFR                 | 3.07E-06         | -3.83E-05 | 9.17E-05  | 2.06E-05  | 7.20E-05  | 1.14E-05  | 8.51E-05             | 4.54E-05  | 2.93E-05  | -2.95E-03 | 1.64E-04        |
| Intercept            | -1.05E-02        | 3.36E-03  | -4.42E-02 | 1.12E-01  | -4.36E-02 | 6.90E-02  | -5.39E-02            | -1.28E-01 | -2.95E-03 | 4.20E+00  | -3.87E-01       |
| Shape parameter      | 9.45E-04         | 1.56E-03  | 4.90E-03  | -6.27E-03 | 4.08E-03  | -5.76E-03 | 7.63E-03             | 1.91E-03  | 1.64E-04  | -3.87E-01 | 4.77E-02        |

eGFR estimated glomerular filtration rate, HF heart failure, Hx history, MI myocardial infarction, UACR urine albumin:creatinine ratio

**Table S7. Covariance Matrix for Nonfatal MI Regression Coefficients**

|                  | Age at Diagnosis | Sex (Female) | Smoking   | MI Hx     | Stroke Hx | HF Hx     | eGFR ≥60  | eGFR <60, ≥45 | eGFR <45, ≥30 | UACR >300 | Intercept |
|------------------|------------------|--------------|-----------|-----------|-----------|-----------|-----------|---------------|---------------|-----------|-----------|
| Age at diagnosis | 1.02E-04         | 1.39E-04     | 2.46E-05  | -2.89E-04 | -1.85E-04 | -3.41E-04 | 3.86E-04  | 3.38E-04      | 2.86E-04      | 4.13E-04  | -5.50E-03 |
| Sex (female)     | 1.39E-04         | 5.68E-02     | 7.99E-03  | 6.21E-03  | 8.50E-04  | -5.08E-03 | 6.69E-03  | 6.43E-03      | 8.80E-03      | 4.29E-03  | -4.01E-02 |
| Smoking          | 2.46E-05         | 7.99E-03     | 7.74E-02  | 5.18E-03  | 2.93E-03  | 3.37E-03  | 6.71E-04  | 6.67E-03      | 9.25E-03      | -3.75E-03 | -2.45E-02 |
| MI Hx            | -2.89E-04        | 6.21E-03     | 5.18E-03  | 6.36E-02  | -4.59E-03 | -6.19E-03 | 2.64E-03  | 7.90E-04      | -1.08E-03     | -3.74E-03 | -3.27E-03 |
| Stroke Hx        | -1.85E-04        | 8.50E-04     | 2.93E-03  | -4.59E-03 | 1.15E-01  | -8.69E-04 | 1.41E-03  | -2.29E-04     | -4.88E-04     | 3.45E-03  | -8.16E-03 |
| HF Hx            | -3.41E-04        | -5.08E-03    | 3.37E-03  | -6.19E-03 | -8.69E-04 | 1.17E-01  | -4.23E-03 | -2.31E-03     | -1.12E-03     | -4.52E-03 | 1.13E-02  |
| eGFR ≥60         | 3.86E-04         | 6.69E-03     | 6.71E-04  | 2.64E-03  | 1.41E-03  | -4.23E-03 | 2.42E-01  | 2.02E-01      | 2.02E-01      | -1.41E-03 | -2.22E-01 |
| eGFR <60, ≥45    | 3.38E-04         | 6.43E-03     | 6.67E-03  | 7.90E-04  | -2.29E-04 | -2.31E-03 | 2.02E-01  | 2.52E-01      | 2.02E-01      | 4.73E-04  | -2.22E-01 |
| eGFR <45, ≥30    | 2.86E-04         | 8.80E-03     | 9.25E-03  | -1.08E-03 | -4.88E-04 | -1.12E-03 | 2.02E-01  | 2.02E-01      | 2.35E-01      | -4.43E-03 | -2.17E-01 |
| UACR >300        | 4.13E-04         | 4.29E-03     | -3.75E-03 | -3.74E-03 | 3.45E-03  | -4.52E-03 | -1.41E-03 | 4.73E-04      | -4.43E-03     | 1.42E-01  | -1.45E-01 |
| Intercept        | -5.50E-03        | -4.01E-02    | -2.45E-02 | -3.27E-03 | -8.16E-03 | 1.13E-02  | -2.22E-01 | -2.22E-01     | -2.17E-01     | -1.45E-01 | 6.33E-01  |

eGFR estimated glomerular filtration rate, HF heart failure, Hx history, MI myocardial infarction, UACR urine albumin:creatinine ratio



**Table S8. Covariance Matrix for Nonfatal Stroke Regression Coefficients**

|                     | Age at Diagnosis | Sex (Female) | Smoking   | MI Hx     | Stroke Hx | HF Hx     | eGFR $\geq 60$ | eGFR $<60, \geq 45$ | eGFR $<45, \geq 30$ | UACR $>300$ | Intercept |
|---------------------|------------------|--------------|-----------|-----------|-----------|-----------|----------------|---------------------|---------------------|-------------|-----------|
| Age at diagnosis    | 1.24E-04         | 1.46E-04     | 7.78E-05  | -1.93E-04 | -1.60E-04 | -5.20E-04 | 4.94E-04       | 4.99E-04            | 3.89E-04            | 4.22E-04    | -6.56E-03 |
| Sex (female)        | 1.46E-04         | 8.47E-02     | 9.02E-03  | 7.10E-03  | 1.39E-03  | -5.01E-03 | 7.81E-03       | 8.17E-03            | 1.16E-02            | 5.13E-03    | -4.27E-02 |
| Smoking             | 7.78E-05         | 9.02E-03     | 2.19E-01  | 6.35E-03  | -7.72E-05 | 3.35E-03  | -3.16E-04      | 5.06E-03            | 7.61E-03            | -2.78E-03   | -2.59E-02 |
| MI Hx               | -1.93E-04        | 7.10E-03     | 6.35E-03  | 9.43E-02  | -7.44E-03 | -7.94E-03 | -8.63E-04      | -3.72E-03           | -7.79E-03           | -2.83E-03   | -3.67E-03 |
| Stroke Hx           | -1.60E-04        | 1.39E-03     | -7.72E-05 | -7.44E-03 | 8.42E-02  | -3.02E-03 | -7.02E-04      | -4.15E-03           | -3.71E-03           | 2.65E-03    | -1.11E-02 |
| HF Hx               | -5.20E-04        | -5.01E-03    | 3.35E-03  | -7.94E-03 | -3.02E-03 | 9.97E-02  | -4.46E-03      | -4.63E-03           | -1.40E-03           | -2.08E-03   | 1.35E-02  |
| eGFR $\geq 60$      | 4.94E-04         | 7.81E-03     | -3.16E-04 | -8.63E-04 | -7.02E-04 | -4.46E-03 | 3.82E-01       | 3.36E-01            | 3.36E-01            | -2.81E-03   | -3.57E-01 |
| eGFR $<60, \geq 45$ | 4.99E-04         | 8.17E-03     | 5.06E-03  | -3.72E-03 | -4.15E-03 | -4.63E-03 | 3.36E-01       | 3.82E-01            | 3.37E-01            | -4.32E-03   | -3.56E-01 |
| eGFR $<45, \geq 30$ | 3.89E-04         | 1.16E-02     | 7.61E-03  | -7.79E-03 | -3.71E-03 | -1.40E-03 | 3.36E-01       | 3.37E-01            | 3.93E-01            | -8.20E-03   | -3.48E-01 |
| UACR $>300$         | 4.22E-04         | 5.13E-03     | -2.78E-03 | -2.83E-03 | 2.65E-03  | -2.08E-03 | -2.81E-03      | -4.32E-03           | -8.20E-03           | 2.19E-01    | -2.18E-01 |
| Intercept           | -6.56E-03        | -4.27E-02    | -2.59E-02 | -3.67E-03 | -1.11E-02 | 1.35E-02  | -3.57E-01      | -3.56E-01           | -3.48E-01           | -2.18E-01   | 8.78E-01  |

eGFR estimated glomerular filtration rate, HF heart failure, Hx history, MI myocardial infarction, UACR urine albumin:creatinine ratio

**Table S9. Covariance Matrix for HHF Regression Coefficients**

|                  | Age at Diagnosis | Sex (Female) | Baseline Smoking | MI Hx     | Stroke Hx | HF Hx     | eGFR ≥60  | eGFR <60, ≥45 | eGFR <45, ≥30 | UACR >300 | Intercept | Shape Parameter |
|------------------|------------------|--------------|------------------|-----------|-----------|-----------|-----------|---------------|---------------|-----------|-----------|-----------------|
| Age at diagnosis | 1.05E-04         | 7.91E-05     | 1.18E-04         | -1.92E-04 | -1.76E-04 | -2.05E-04 | 5.30E-04  | 4.10E-04      | 2.84E-04      | 1.65E-04  | -1.74E-02 | 8.84E-04        |
| Sex (female)     | 7.91E-05         | 3.70E-02     | 5.40E-03         | 3.32E-03  | 9.58E-04  | -3.30E-03 | 2.51E-03  | 3.10E-03      | 4.53E-03      | 1.71E-03  | -2.21E-02 | 6.10E-05        |
| Smoking          | 1.18E-04         | 5.40E-03     | 5.85E-02         | 2.83E-03  | 1.29E-04  | 2.06E-03  | -1.34E-03 | 1.12E-03      | 2.18E-03      | -1.60E-03 | -3.94E-02 | 1.65E-03        |
| MI Hx            | -1.92E-04        | 3.32E-03     | 2.83E-03         | 4.62E-02  | -2.53E-03 | -4.41E-03 | 7.88E-04  | 1.05E-03      | -4.52E-04     | -3.23E-03 | 1.78E-02  | -1.20E-03       |
| Stroke Hx        | -1.76E-04        | 9.58E-04     | 1.29E-04         | -2.53E-03 | 7.22E-02  | -1.30E-03 | -7.80E-04 | -3.24E-03     | -2.62E-03     | 3.48E-03  | 2.56E-02  | -1.99E-03       |
| HF Hx            | -2.05E-04        | -3.30E-03    | 2.06E-03         | -4.41E-03 | -1.30E-03 | 3.95E-02  | -1.44E-03 | -1.04E-03     | -5.21E-04     | -1.43E-03 | 9.18E-04  | 1.47E-04        |
| eGFR ≥60         | 5.30E-04         | 2.51E-03     | -1.34E-03        | 7.88E-04  | -7.80E-04 | -1.44E-03 | 1.93E-01  | 1.69E-01      | 1.68E-01      | -2.12E-03 | -2.60E-01 | 4.98E-03        |
| eGFR <60, ≥45    | 4.10E-04         | 3.10E-03     | 1.12E-03         | 1.05E-03  | -3.24E-03 | -1.04E-03 | 1.69E-01  | 1.98E-01      | 1.68E-01      | -2.75E-03 | -2.22E-01 | 2.63E-03        |
| eGFR <45, ≥30    | 2.84E-04         | 4.53E-03     | 2.18E-03         | -4.52E-04 | -2.62E-03 | -5.21E-04 | 1.68E-01  | 1.68E-01      | 1.90E-01      | -4.39E-03 | -1.85E-01 | 4.03E-04        |
| UACR >300        | 1.65E-04         | 1.71E-03     | -1.60E-03        | -3.23E-03 | 3.48E-03  | -1.43E-03 | -2.12E-03 | -2.75E-03     | -4.39E-03     | 1.53E-01  | -1.31E-01 | -1.34E-03       |
| Intercept        | -1.74E-02        | -2.21E-02    | -3.94E-02        | 1.78E-02  | 2.56E-02  | 9.18E-04  | -2.60E-01 | -2.22E-01     | -1.85E-01     | -1.31E-01 | 5.45E+00  | -3.18E-01       |
| Shape parameter  | 8.84E-04         | 6.10E-05     | 1.65E-03         | -1.20E-03 | -1.99E-03 | 1.47E-04  | 4.98E-03  | 2.63E-03      | 4.03E-04      | -1.34E-03 | -3.18E-01 | 2.05E-02        |

eGFR estimated glomerular filtration rate, HF heart failure, Hx history, MI myocardial infarction, UACR urine albumin:creatinine ratio

**Table S10. Covariance Matrix for All-cause Mortality Regression Coefficients**

|                                               | Age (at<br>Diagnosis/at<br>Death) | HF Hx     | MI Hx     | Stroke Hx | Smoking Status | Female    | MI Hx <sup>a</sup> | HF Hx <sup>a</sup> | Stroke Hx <sup>a</sup> | eGFR <15 <sup>a</sup> | Start of<br>Maintenance<br>Dialysis <sup>a</sup> | <i>Intercept</i> |
|-----------------------------------------------|-----------------------------------|-----------|-----------|-----------|----------------|-----------|--------------------|--------------------|------------------------|-----------------------|--------------------------------------------------|------------------|
| Age (at diagnosis/at death)                   | 4.01E-05                          | -7.87E-05 | -4.10E-05 | -3.86E-05 | 4.53E-05       | 5.95E-05  | -2.77E-05          | -3.39E-05          | 1.37E-05               | -1.82E-04             | 4.55E-04                                         | -2.01E-03        |
| HF Hx                                         | -7.87E-05                         | 3.13E-02  | -3.08E-03 | -4.20E-04 | 2.97E-03       | -3.94E-03 | 7.20E-04           | -5.95E-03          | 7.39E-04               | 7.30E-03              | -5.18E-03                                        | -9.85E-04        |
| MI Hx                                         | -4.10E-05                         | -3.08E-03 | 3.79E-02  | -2.34E-03 | 2.68E-03       | 2.49E-03  | -3.24E-03          | -3.89E-03          | -1.99E-03              | 4.43E-03              | -2.21E-03                                        | -3.23E-03        |
| Stroke Hx                                     | -3.86E-05                         | -4.20E-04 | -2.34E-03 | 3.93E-02  | -2.72E-04      | 5.89E-04  | 7.33E-04           | 3.79E-03           | -7.16E-03              | 6.25E-03              | -6.66E-03                                        | -3.69E-03        |
| Smoking Status                                | 4.53E-05                          | 2.97E-03  | 2.68E-03  | -2.72E-04 | 4.21E-02       | 3.37E-03  | -4.30E-03          | -6.16E-04          | 3.73E-03               | -2.07E-03             | 3.82E-03                                         | -1.04E-02        |
| Female                                        | 5.95E-05                          | -3.94E-03 | 2.49E-03  | 5.89E-04  | 3.37E-03       | 2.52E-02  | 2.27E-04           | 5.18E-04           | 2.65E-03               | -2.80E-03             | 6.89E-03                                         | -1.17E-02        |
| MI Hx <sup>a</sup>                            | -2.77E-05                         | 7.20E-04  | -3.24E-03 | 7.33E-04  | -4.30E-03      | 2.27E-04  | 5.94E-02           | -2.57E-02          | 4.33E-03               | 4.53E-03              | -1.27E-02                                        | -1.21E-03        |
| HF Hx <sup>a</sup>                            | -3.39E-05                         | -5.95E-03 | -3.89E-03 | 3.79E-03  | -6.16E-04      | 5.18E-04  | -2.57E-02          | 5.29E-02           | -6.00E-03              | -3.31E-03             | -1.12E-02                                        | -3.06E-04        |
| Stroke Hx <sup>a</sup>                        | 1.37E-05                          | 7.39E-04  | -1.99E-03 | -7.16E-03 | 3.73E-03       | 2.65E-03  | 4.33E-03           | -6.00E-03          | 4.89E-02               | 4.92E-03              | -4.66E-04                                        | -6.77E-03        |
| eGFR <15 <sup>a</sup>                         | -1.82E-04                         | 7.30E-03  | 4.43E-03  | 6.25E-03  | -2.07E-03      | -2.80E-03 | 4.53E-03           | -3.31E-03          | 4.92E-03               | 9.93E-02              | -6.06E-02                                        | 3.76E-03         |
| Start of maintenance<br>dialysis <sup>a</sup> | 4.55E-04                          | -5.18E-03 | -2.21E-03 | -6.66E-03 | 3.82E-03       | 6.89E-03  | -1.27E-02          | -1.12E-02          | -4.66E-04              | -6.06E-02             | 9.55E-02                                         | -2.45E-02        |
| <i>Intercept</i>                              | -2.01E-03                         | -9.85E-04 | -3.23E-03 | -3.69E-03 | -1.04E-02      | -1.17E-02 | -1.21E-03          | -3.06E-04          | -6.77E-03              | 3.76E-03              | -2.45E-02                                        | 1.14E-01         |

<sup>a</sup>Time-varying

eGFR estimated glomerular filtration rate, HF heart failure, Hx history, MI myocardial infarction, UACR urine albumin:creatinine ratio

**Table S11. Covariance Matrix for Cardiovascular Cause of Death Regression Coefficients**

|                                            | Age (at Diagnosis/at Death) | Sex (Female) | MI Hx <sup>a</sup> | HF Hx <sup>a</sup> | Stroke Hx <sup>a</sup> | eGFR <60, ≥45 <sup>a</sup> | eGFR <45, ≥30 <sup>a</sup> | eGFR <30 <sup>a</sup> | UACR >300 <sup>a</sup> | Start of Maintenance Dialysis <sup>a</sup> | Diabetes Duration | Intercept |
|--------------------------------------------|-----------------------------|--------------|--------------------|--------------------|------------------------|----------------------------|----------------------------|-----------------------|------------------------|--------------------------------------------|-------------------|-----------|
| Age (at diagnosis/at death)                | 1.15E-04                    | -9.30E-05    | -1.20E-04          | 3.00E-05           | -9.00E-05              | -4.20E-04                  | -1.80E-04                  | 1.70E-04              | 1.50E-04               | 1.70E-04                                   | -1.15E-04         | -5.47E-03 |
| Sex (female)                               | -9.25E-05                   | 6.59E-02     | 3.65E-03           | -6.84E-03          | 2.54E-03               | 3.59E-03                   | -4.35E-03                  | -6.48E-03             | 2.25E-03               | 6.53E-03                                   | 9.77E-05          | -1.87E-02 |
| MI Hx <sup>a</sup>                         | -1.23E-04                   | 3.66E-03     | 7.81E-02           | -5.51E-03          | -6.40E-04              | -1.70E-04                  | -2.10E-03                  | 2.23E-03              | -1.21E-03              | -3.66E-03                                  | 1.19E-04          | -6.35E-03 |
| HF Hx <sup>a</sup>                         | 3.39E-05                    | -6.84E-03    | -5.51E-03          | 6.80E-02           | -1.23E-03              | 1.01E-03                   | 4.37E-03                   | -5.70E-04             | -2.77E-03              | 2.88E-03                                   | -5.01E-05         | -7.53E-03 |
| Stroke Hx <sup>a</sup>                     | -8.69E-05                   | 2.54E-03     | -6.40E-04          | -1.23E-03          | 8.55E-02               | -1.43E-02                  | -9.33E-03                  | -1.01E-03             | -1.44E-03              | -5.67E-03                                  | 8.64E-05          | -4.70E-03 |
| eGFR <60, ≥45 <sup>a</sup>                 | -4.24E-04                   | 3.59E-03     | -1.70E-04          | 1.01E-03           | -1.43E-02              | 1.36E-01                   | 6.50E-02                   | 6.74E-02              | -1.93E-02              | -3.76E-03                                  | 4.08E-04          | -1.69E-02 |
| eGFR <45, ≥30 <sup>a</sup>                 | -1.84E-04                   | -4.35E-03    | -2.10E-03          | 4.37E-03           | -9.33E-03              | 6.50E-02                   | 1.01E-01                   | 6.68E-02              | -7.76E-03              | -1.19E-02                                  | 1.71E-04          | -3.65E-02 |
| eGFR <30 <sup>a</sup>                      | 1.72E-04                    | -6.49E-03    | 2.23E-03           | -5.70E-04          | -1.01E-03              | 6.74E-02                   | 6.68E-02                   | 1.46E-01              | -1.95E-02              | -3.40E-02                                  | -2.02E-04         | -3.47E-02 |
| UACR >300 <sup>a</sup>                     | 1.53E-04                    | 2.25E-03     | -1.21E-03          | -2.77E-03          | -1.44E-03              | -1.93E-02                  | -7.76E-03                  | -1.95E-02             | 8.74E-02               | -6.33E-03                                  | -1.48E-04         | -6.79E-02 |
| Start of maintenance dialysis <sup>a</sup> | 1.74E-04                    | 6.53E-03     | -3.66E-03          | 2.88E-03           | -5.67E-03              | -3.76E-03                  | -1.19E-02                  | -3.40E-02             | -6.33E-03              | 1.30E-01                                   | -1.75E-04         | -8.80E-03 |
| Diabetes duration                          | -1.15E-04                   | 9.80E-05     | 1.20E-04           | -5.00E-05          | 9.00E-05               | 4.10E-04                   | 1.70E-04                   | -2.00E-04             | -1.50E-04              | -1.70E-04                                  | 1.15E-04          | 5.38E-03  |
| Intercept                                  | -5.47E-03                   | -1.87E-02    | -6.35E-03          | -7.53E-03          | -4.70E-03              | -1.69E-02                  | -3.65E-02                  | -3.47E-02             | -6.79E-02              | -8.80E-03                                  | 5.38E-03          | 4.27E-01  |

<sup>a</sup>Time-varying

eGFR estimated glomerular filtration rate, HF heart failure, Hx history, MI myocardial infarction, UACR urine albumin:creatinine ratio

## Risk Prediction Equation of ESKD

A description of the results for ESKD, which was intended for assessing the robustness of the dialysis equation, is presented in Table S12 and the associated predictions of the cumulative incidence graphically compared with the study Kaplan-Meier curves are presented in Figure S1. The results are in line with those of start of maintenance dialysis with the exception of stroke, which had a statistically insignificant protective effect.

**Table S12. Risk Equations: ESKD**

| <b>Parameter</b>           | <b>ESKD</b>                        |          |
|----------------------------|------------------------------------|----------|
|                            | Weibull<br>N = 2,012<br>100 Events |          |
|                            | HR (SE)                            | <i>P</i> |
| Intercept                  | 4.16E-04 (8.67E-04)                | <0.001   |
| P <sup>a</sup>             | 0.438 (0.138)                      | <0.001   |
| Age at T2DM diagnosis      | 0.973 (0.007)                      | <0.001   |
| Female                     | 0.931 (0.150)                      | 0.657    |
| Smoking                    | 0.633 (0.162)                      | 0.073    |
| MI Hx                      | 0.853 (0.214)                      | 0.527    |
| Stroke Hx                  | 0.911 (0.238)                      | 0.721    |
| HF Hx                      | 0.921 (0.197)                      | 0.7      |
| eGFR                       | 0.939 (0.006)                      | <0.001   |
| ln(UACR)                   | 3.496 (0.413)                      | <0.001   |
| First-year indicator       | 0.245 (0.042)                      | <0.001   |
| AIC                        | 165.315                            |          |
| C statistic                |                                    |          |
| Placebo                    | 0.865                              |          |
| Canagliflozin              | 0.856                              |          |
| Calibration                |                                    |          |
| Placebo                    | 0.998                              |          |
| Canagliflozin <sup>b</sup> | 1.089                              |          |

<sup>a</sup>Time-varying

<sup>b</sup>After adjusting for the trial-reported HR for canagliflozin.

AIC Akaike information criterion, CV cardiovascular, eGFR estimated glomerular filtration rate, ESKD end-stage kidney disease, HF heart failure, HR hazard ratio, Hx history, MI myocardial infarction, SE standard error, UACR urine albumin:creatinine ratio

**Figure S1. Predicted cumulative incidence of ESKD vs. study Kaplan-Meier, by study arm.**

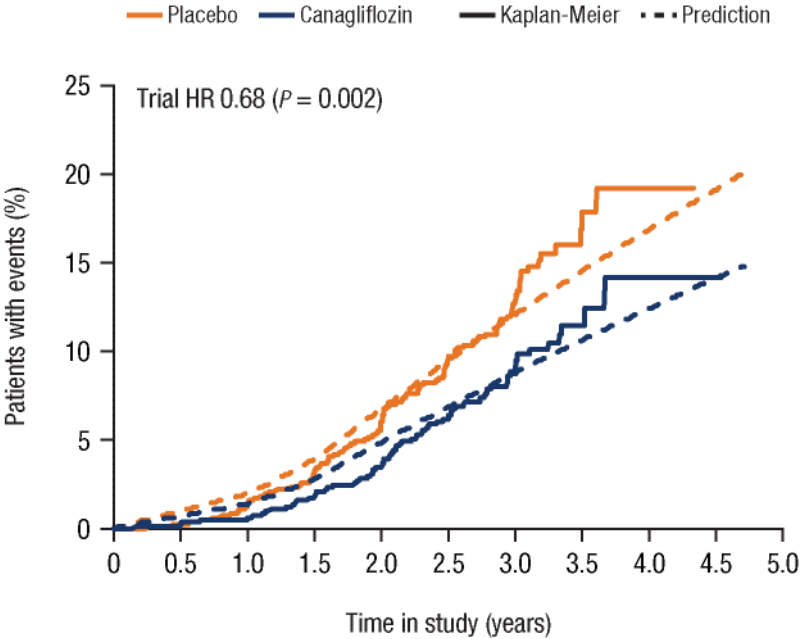

ESKD end-stage kidney disease, HR hazard ratio

**Table S13. Stress-testing Overview**

| Scenario                    |    | Description                                                               | BC Value                                                              | Test value                                                                                           | Expected Outcomes                                                                                                                                                                                                                                                                                                                                                                                                                                                                                                                | Results                                                                                               |
|-----------------------------|----|---------------------------------------------------------------------------|-----------------------------------------------------------------------|------------------------------------------------------------------------------------------------------|----------------------------------------------------------------------------------------------------------------------------------------------------------------------------------------------------------------------------------------------------------------------------------------------------------------------------------------------------------------------------------------------------------------------------------------------------------------------------------------------------------------------------------|-------------------------------------------------------------------------------------------------------|
| Base Case                   | BC | --                                                                        | --                                                                    | --                                                                                                   | (1) CV event rates should be lower in the intervention arm<br>(2) Rates for dialysis and transplant should be lower in the intervention arm<br>(3) CKD should progress over time with no regression of CKD<br>(4) AE rates should be 0 in the comparator arm<br>(5) CV mortality should be lower in the intervention arm<br>(6) Procedural mortality should be lower in the intervention arm<br>(7) Other cause mortality should be lower in the intervention arm<br>(8) SoC costs should equal 100 X LY in the intervention arm |                                                                                                       |
| transplant stage 5 pre-RRT  | T1 | Set an extremely high risk of transplant in stage 5 pre-RRT               | Start eGFR: 55<br>Event rate pre-RRT: 0.1<br>Event rate post-RRT: 0.1 | Start eGFR: 15<br>Event rate pre-RRT: 10000<br>Event rate post-RRT: 0                                | Everyone reaching the stage receives transplant, no-one progresses to dialysis, no costs for dialysis                                                                                                                                                                                                                                                                                                                                                                                                                            | Everyone reaching the stage receives transplant, no-one progresses to dialysis, no costs for dialysis |
| transplant stage 5 post-RRT | T2 | Set an extremely high risk of transplant in stage 5 post-RRT, others to 0 | Start eGFR: 55<br>Event rate pre-RRT: 0.1<br>Event rate post-RRT: 0.1 | Start eGFR: 15<br>Event rate pre-RRT: 0<br>Event rate post-RRT: 10000<br>HR for dialysis set to 1000 | Everyone reaching the stage receives transplant, no-one progresses to dialysis, no costs for dialysis                                                                                                                                                                                                                                                                                                                                                                                                                            | Everyone reaching the stage receives transplant, no-one progresses to dialysis, no costs for dialysis |
| transplant stage 5 pre-RRT  | T3 | Set low risk of transplant in stage 5 pre-RRT                             | Start eGFR: 55<br>Event rate pre-RRT: 0.1<br>Event rate post-RRT: 0.1 | Start eGFR: 15<br>Event rate pre-RRT: 0<br>Event rate post-RRT: 0                                    | No incidence of transplant, no costs for transplant                                                                                                                                                                                                                                                                                                                                                                                                                                                                              | Extremely small event rates, cost indicate 1,47 events.                                               |
| Minimum eGFR for transplant | T4 | Minimum level set at 200                                                  | eGFR threshold: 10                                                    | eGFR threshold: 200<br>probability of transplant: 100%                                               | Everyone receives transplant at simulation start, no start of dialysis                                                                                                                                                                                                                                                                                                                                                                                                                                                           | Everyone receives transplant at simulation start, no start of dialysis                                |
| Minimum eGFR for dialysis   | T5 | Minimum level set at 200                                                  | eGFR threshold: 10                                                    | eGFR threshold: 200<br>probability of transplant: 0%                                                 | Everyone receives dialysis at simulation start                                                                                                                                                                                                                                                                                                                                                                                                                                                                                   | Large amounts of dialysis at start                                                                    |

| Scenario                                       |            | Description                                                      | BC Value           | Test value                                           | Expected Outcomes                                                                                                         | Results                                                                                      |
|------------------------------------------------|------------|------------------------------------------------------------------|--------------------|------------------------------------------------------|---------------------------------------------------------------------------------------------------------------------------|----------------------------------------------------------------------------------------------|
| Minimum eGFR for transplant                    | <b>T6</b>  | Minimum level set at 0                                           | eGFR threshold: 10 | eGFR threshold: 0<br>probability of transplant: 100% | No start of transplant at simulation start                                                                                | No start of transplant at simulation start                                                   |
| Minimum eGFR for dialysis                      | <b>T7</b>  | Minimum level set at 0                                           | eGFR threshold: 10 | eGFR threshold: 0<br>probability of transplant: 0%   | No start of dialysis at simulation start                                                                                  | No start of dialysis at simulation start                                                     |
| Minimum eGFR for death                         | <b>T8</b>  | Minimum level set at 200                                         | eGFR threshold: 5  | eGFR threshold: 200                                  | Everyone dies at simulation start                                                                                         | Everyone dies at simulation start                                                            |
| Minimum eGFR for death                         | <b>T9</b>  | Minimum level set at 0                                           | eGFR threshold: 5  | eGFR threshold: 0                                    | Results in line with BC                                                                                                   | Results in line with BC                                                                      |
| Extreme first year HRs mortality               | <b>T10</b> | First year HR set to 0,000001                                    | 0.5                | 0.000001                                             | Minimum amount of mortality in first year for intervention arm, PBO arm should be unaffected                              | Minimum amount of mortality in first year for intervention arm, PBO arm should be unaffected |
| Extreme first year HRs for mortality           | <b>T11</b> | First year HR set to 100                                         | 0.5                | 100.0                                                | High amount of mortality in first year for intervention arm, PBO arm should be unaffected                                 | High amount of mortality in first year for intervention arm, PBO arm should be unaffected    |
| Extreme first year HRs for other complications | <b>T12</b> | First year HR set to 0,000001                                    | 0.5                | 0.000001                                             | Minimum number of events in first year, PBO arm should be unaffected                                                      | Minimum number of events in first year, PBO arm should be unaffected                         |
| Extreme first year HRs for other complications | <b>T13</b> | First year HR set to 100                                         | 0.5                | 100.0                                                | Extreme number of events for intervention arm in first year, PBO arm should be unaffected                                 | Extreme number of events for intervention arm in first year, PBO arm should be unaffected    |
| No treatment effect in first year              | <b>T14</b> | First year HR set to 1                                           | 0.5                | 1.0                                                  | Intervention arm follows comparator arm, PBO arm should be unaffected                                                     | Intervention arm follows comparator arm, PBO arm unaffected                                  |
| Immediate cessation during simulation time     | <b>T15</b> | Immediate secession set after year 1 and before simulation end   | Inactive           | Cessation after year 1                               | Event rates should be in line with PBO arm, Higher event rates than BC for intervention arm, PBO arm should be unaffected | Lower events in intervention arm in first year and then diminish difference between arms     |
| Immediate cessation after simulation time      | <b>T16</b> | Immediate secession set after year 100 and before simulation end | Inactive           | Cessation after year 100                             | Same as BC                                                                                                                | Same as BC                                                                                   |
| Fade-out during simulation                     | <b>T17</b> | Fade out effect at year 2 with a fade-                           | Inactive           | Cessation after year 2 with fade-off set to 2 years  | Lower event rates for intervention arm than in BC, PBO arm should be unaffected                                           | Lower event rates for intervention arm than in BC, PBO arm should be unaffected              |



| Scenario                      |     | Description                                                              | BC Value                                | Test value                                             | Expected Outcomes                                                                                                                                  | Results                                                                                                                                            |
|-------------------------------|-----|--------------------------------------------------------------------------|-----------------------------------------|--------------------------------------------------------|----------------------------------------------------------------------------------------------------------------------------------------------------|----------------------------------------------------------------------------------------------------------------------------------------------------|
|                               |     | duration of 2 years                                                      |                                         |                                                        |                                                                                                                                                    |                                                                                                                                                    |
| Fade-out beyond simulation    | T18 | Fade out effect at year 2 with a fade-duration of 1000 years             | Inactive                                | Cessation after year 2 with fade-off set to 1000 years | Results for intervention arm almost identical to those in BC and more favorable than results of Verification Test TX, PBO arm should be unaffected | Results for intervention arm almost identical to those in BC and more favorable than results of Verification Test TX, PBO arm should be unaffected |
| Fade-out after simulation     | T19 | Fade out effect starts after simulation ends                             | Inactive                                | Cessation after year 2 with fade-off set to 11 years   | Same as BC                                                                                                                                         | Same as BC                                                                                                                                         |
| Intervention same as SoC      | T20 | Set intervention HR to 1                                                 | 0.5                                     | 1.0                                                    | The results should be the same in both for both arms                                                                                               | Events same as Placebo                                                                                                                             |
| Active comparator             | T21 | Set active comparator effects to HR 1 and Intervention effects to HR 0.5 | Intervention only                       | HR active comparator: 1.0<br>HR intervention: 0.5      | The results should be the same as the BC for the intervention arm and the comparator arm                                                           | The results should be the same as the BC for the intervention arm and the comparator arm                                                           |
| <u>Zero Values</u>            |     |                                                                          |                                         |                                                        |                                                                                                                                                    |                                                                                                                                                    |
| Progression                   | T22 | Set progression to 0                                                     | As in CREDENCE                          | deactivated risk equations                             | No new events should occur                                                                                                                         | No events occurring                                                                                                                                |
| Pre-existing CV comorbidities | T23 | Set pre-existing CV comorbidities to 0                                   | CV history: 10%                         | CV history: 0%                                         | State costs and disutility for CV events should be 0 in year one leading to less costs and QALYs CV compared to the BC in both arms                | Less QALYs of CV compared to BC in both arms                                                                                                       |
| Mortality                     | T24 | Set mortality to 0                                                       | As in CREDENCE                          | Deactivated mortality                                  | 100% survival in both arms                                                                                                                         | Almost 100% survival, believe to be settings related                                                                                               |
| State and event costs         | T25 | Set all state and event costs to 0                                       | Costs applied for events                | No costs applied for events                            | Event and state costs should be 0                                                                                                                  | Event and state costs should be 0                                                                                                                  |
| Treatment costs               | T26 | Set treatment costs to 0                                                 | Treatment costs for intervention: 1 000 | Treatment costs for intervention: 0                    | Treatment costs should be 0 in the intervention arm                                                                                                | Treatment costs should be 0 in the intervention arm                                                                                                |
| Treatment effects             | T27 | Set all HRs for the intervention                                         | HR for intervention arm: 0.5            | HR for intervention arm: 0.000001                      | In the Intervention arm: (1) almost 0 events should occur; (2) almost 0 event costs. In comparator arm: similar results as BC                      | As Expected,                                                                                                                                       |

| Scenario                  |     | Description                                | BC Value                                          | Test value                                        | Expected Outcomes                                                                                                                                                                              | Results                                                                                                                                                                                        |
|---------------------------|-----|--------------------------------------------|---------------------------------------------------|---------------------------------------------------|------------------------------------------------------------------------------------------------------------------------------------------------------------------------------------------------|------------------------------------------------------------------------------------------------------------------------------------------------------------------------------------------------|
|                           |     | arm to 0.000001                            |                                                   |                                                   |                                                                                                                                                                                                |                                                                                                                                                                                                |
| <u>Doubling of inputs</u> |     |                                            |                                                   |                                                   |                                                                                                                                                                                                |                                                                                                                                                                                                |
| Event rates               | T28 | Double all event rates                     | As in CREDENCE                                    | Double the risk of events                         | Predicted events rates for HHF, MI, and stroke are doubled compared to BC                                                                                                                      | HHF & stroke doubled; MI substantially higher                                                                                                                                                  |
| Mortality                 | T29 | Double mortality rate                      | As in CREDENCE                                    | Double the risk of mortality                      | All-cause death is doubled compare to BC                                                                                                                                                       | All-cause death more than doubled compared to BC                                                                                                                                               |
| State and event costs     | T30 | Double all state and event costs           | Costs applied for events                          | Double costs applied for events                   | Event and state costs for CKD and CV should be doubled compared to BC                                                                                                                          | Event and state costs for CKD and CV doubled compared to BC                                                                                                                                    |
| Treatment costs           | T31 | Double the treatment cost for intervention | Treatment costs for intervention/comparator: 1000 | Treatment costs for intervention/comparator: 2000 | Treatment cost for intervention doubled compared to BC                                                                                                                                         | Treatment cost for intervention doubled compared to BC                                                                                                                                         |
| Treatment effects         | T32 | Set all HRs for the intervention arm to 2  | HR for intervention arm: 1.0                      | HR for intervention arm: 2.0                      | In intervention arm: (1) Even and CV/CKD mortality rates should be higher in the intervention arm; (2) Cost should be higher in the intervention arm; In comparator arm: similar results as BC | In intervention arm: (1) Even and CV/CKD mortality rates should be higher in the intervention arm; (2) Cost should be higher in the intervention arm; In comparator arm: similar results as BC |
| <u>Baseline</u>           |     |                                            |                                                   |                                                   |                                                                                                                                                                                                |                                                                                                                                                                                                |
| Age                       | T33 | Set a low starting age                     | Starting age: 60(10)                              | Starting age: 40                                  | (1) LY should be higher than BC                                                                                                                                                                | Higher LY than BC.                                                                                                                                                                             |
| Age                       | T34 | Set a high starting age                    | Starting age: 60(10)                              | Starting age: 80                                  | (1) LY should be lower than BC                                                                                                                                                                 | LY lower than BC.                                                                                                                                                                              |
| Sex                       | T35 | Set all patients to male                   | 50% male/females                                  | 100% males                                        | (1) LY should be lower vs BC                                                                                                                                                                   | (1) LY lower vs BC                                                                                                                                                                             |
| Sex                       | T36 | Set all patients to female                 | 50% male/females                                  | 100% females                                      | (1) LY should higher vs BV                                                                                                                                                                     | (1) LY higher vs BC                                                                                                                                                                            |
| Smoking                   | T37 | Set smoking status to 0%                   | 10% Smokers                                       | 0% Smokers                                        | (1) Lower LY vs BC                                                                                                                                                                             | (1) Lower LY vs BC                                                                                                                                                                             |
| Smoking                   | T38 | Set smoking status to 100%                 | 10% Smokers                                       | 100% Smokers                                      | (1) Higher LY vs BC                                                                                                                                                                            | Slightly lower LY vs BC                                                                                                                                                                        |
| Diabetes Duration         | T39 | No diabetes duration                       | Diabetes duration 10(5)                           | Diabetes duration 0                               | (1) LY should be lower vs. BC (2) eGFR should decline more than BC                                                                                                                             | (1) LY lower vs. BC (2) very similar eGFR decline compared to BC                                                                                                                               |

| Scenario                      |     | Description                                                              | BC Value                                | Test value                                       | Expected Outcomes                                                                                                                               | Results                                                                                    |
|-------------------------------|-----|--------------------------------------------------------------------------|-----------------------------------------|--------------------------------------------------|-------------------------------------------------------------------------------------------------------------------------------------------------|--------------------------------------------------------------------------------------------|
| Diabetes Duration             | T40 | Long diabetes duration                                                   | Diabetes duration 10(5)                 | Diabetes duration 20                             | (1) LY should be higher vs. BC (2) eGFR should decline less than BC                                                                             | (1) LY higher vs. BC (2) very similar eGFR decline compared to BC                          |
| eGFR                          | T41 | Set a low eGFR                                                           | Baseline eGFR: 55                       | Baseline eGFR: 30                                | (1) LY should be lower vs. BC (2) CV and CKD event should be higher vs. BC                                                                      | LY lower than BC. CV and CKD event higher than BC                                          |
| eGFR                          | T42 | Set a high eGFR                                                          | Baseline eGFR: 55                       | Baseline eGFR: 90                                | (1) LY should be higher vs. BC (2) CV and CKD event should be lower vs. BC                                                                      | (1) LY higher vs. BC (2) CV and CKD event lower vs. BC                                     |
| log (UACR)                    | T43 | Set a low log (UACR)                                                     | Baseline log (UACR): 6.5                | Baseline log (UACR): 3                           | (1) LY should be higher vs. BC (2) DoSCr should be lower vs BC (3) Lower rates of CKD and CV event                                              | (1) LY higher vs. BC (2) Lower rates of CKD and CV event. (3) DoSCr lower than BC          |
| log (UACR)                    | T44 | Set a high log (UACR)                                                    | Baseline log (UACR): 6.5                | Baseline log (UACR): 9                           | (1) Lower LY vs BC (2) DoSCr rates should be higher vs BC (3) Higher rates of CV and CKD events                                                 | (1) Lower LY than BC. (2) DOSCr higher than BC. (3) higher event rates                     |
| Pre-existing CV comorbidities | T45 | Set pre-existing CV complications to 100%                                | CV history: 10%                         | CV history: 100%                                 | (1) LY should be lower vs BC (2) Costs should be greater vs. BC                                                                                 | (1) lower LY than BC (2) CV costs greater than BC, Higher costs in BC from treatment costs |
| <b>Other logic tests</b>      |     |                                                                          |                                         |                                                  |                                                                                                                                                 |                                                                                            |
| State costs                   | T46 | Set pre-existing CV complications to 100%, event and mortality rate to 0 | CV history: 10%<br>Risk: As in CREDENCE | CV history: 100%<br>Mortality Intercept - 10,000 | CV State costs should equal state costs for CV history times LY, should equal time horizon => (MI+stroke+HF) X LY => (500+500+500) X 10 =15,000 | Approx. 15,000 (15,882)                                                                    |
| Mortality                     | T47 | Set mortality risk high                                                  | As in CREDENCE                          | Mortality intercept: 10,000                      | All-cause mortality should be almost 100% in year 1                                                                                             | Mortality at 100% at year 1                                                                |
| Slope effect eGFR             | T48 | Set slope to 0 for the intervention                                      | Slope: 2.0                              | Slope: 0.0                                       | (1) 100% of patients should be in Stage 5 at simulation start, (2) no progression should occur, (3) All patients should regress over time       | 100% of patients in Stage 5, patients regress over time                                    |
| Slope effect eGFR             | T49 | Set slope to 100 for the intervention                                    | Slope: 2.0                              | Slope: 100                                       | Intervention group regress to Stage 1                                                                                                           | Intervention group regress to Stage 1                                                      |
| <b>Baseline CKD stage</b>     |     |                                                                          |                                         |                                                  |                                                                                                                                                 |                                                                                            |
| 100% in stage 1               | T50 | Set baseline CKD stage to 100% in stage 1                                | Distribution between all CKD stages     | eGFR 100                                         | 100% of patients should be in stage 1 at baseline, progression should occur over time                                                           | 100% of patients should be in stage 1 at baseline, progression should occur over time      |

| Scenario                |            | Description                                                                  | BC Value                            | Test value                          | Expected Outcomes                                                                                                                                        | Results                                                                                |
|-------------------------|------------|------------------------------------------------------------------------------|-------------------------------------|-------------------------------------|----------------------------------------------------------------------------------------------------------------------------------------------------------|----------------------------------------------------------------------------------------|
| 100% in stage 2         | <b>T51</b> | Set baseline CKD stage to 100% in stage 2                                    | Distribution between all CKD stages | eGFR 75                             | 100% of patients should be in stage 2 at baseline, progression should occur over time                                                                    | 100% of patients should be in stage 2 at baseline, progression should occur over time  |
| 100% in stage 3a        | <b>T52</b> | Set baseline CKD stage to 100% in stage 3a                                   | Distribution between all CKD stages | eGFR 52.5                           | 100% of patients should be in stage 3a at baseline, progression should occur over time                                                                   | 100% of patients should be in stage 3a at baseline, progression should occur over time |
| 100% in stage 3b        | <b>T53</b> | Set baseline CKD stage to 100% in stage 3b                                   | Distribution between all CKD stages | eGFR 37.5                           | 100% of patients should be in stage 3b at baseline, progression should occur over time                                                                   | 100% of patients should be in stage 3b at baseline, progression should occur over time |
| 100% in stage 4         | <b>T54</b> | Set baseline CKD stage to 100% in stage 4                                    | Distribution between all CKD stages | eGFR 22.5                           | 100% of patients should be in stage 4 at baseline, progression should occur over time                                                                    | 100% of patients should be in stage 4 at baseline, progression should occur over time  |
| 100% in stage 5         | <b>T55</b> | Set baseline CKD stage to 100% in stage 5                                    | Distribution between all CKD stages | eGFR 5                              | 100% of patients should be in stage 5 at baseline                                                                                                        | 100% of patients should be in stage 5 at baseline                                      |
| <b>Adverse events</b>   |            |                                                                              |                                     |                                     |                                                                                                                                                          |                                                                                        |
| Once                    | <b>T56</b> | Set the occurrence for AE to Once                                            | Recurrent AE                        | AE can only occur once              | Less AE events/costs compared to BC in the intervention arm                                                                                              | Less AE events/costs compared to BC in the intervention arm                            |
| Permanent               | <b>T57</b> | Set the occurrence for AE to permanent                                       | Recurrent AE                        | AE are permanent                    | Less events but more costs related to AE compared to BC in the intervention arm                                                                          | Less events but more costs related to AE compared to BC in the intervention arm        |
| Stop treatment for AE A | <b>T58</b> | Set AE event rate for event A to 10 000, activate stop treatment for event A | Rate: 0.1<br>Stop treatment: No     | Rate: 10 000<br>Stop treatment: Yes | (1) Intervention should be stopped almost immediately (2) The results should be the same in both treatment arms with the exception of AE-related results | No time on treatment, results similar. More transplants in intervention arm            |
| Stop treatment for AE B | <b>T59</b> | Set AE event rate for event B to 10 000, activate stop treatment for event B | Rate: 0.1<br>Stop treatment: No     | Rate: 10 000<br>Stop treatment: Yes | (1) Intervention should be stopped almost immediately (2) The results should be the same in both treatment arms with the exception of AE-related results | No time on treatment, results similar. More transplants in intervention arm            |

| Scenario                |     | Description                                                                  | BC Value                        | Test value                                                                                                | Expected Outcomes                                                                                                                                        | Results                                                                           |
|-------------------------|-----|------------------------------------------------------------------------------|---------------------------------|-----------------------------------------------------------------------------------------------------------|----------------------------------------------------------------------------------------------------------------------------------------------------------|-----------------------------------------------------------------------------------|
| Stop treatment for AE C | T60 | Set AE event rate for event C to 10 000, activate stop treatment for event C | Rate: 0.1<br>Stop treatment: No | Rate: 10 000<br>Stop treatment: Yes                                                                       | (1) Intervention should be stopped almost immediately (2) The results should be the same in both treatment arms with the exception of AE-related results | No time on treatment, results similar.<br>More transplants in intervention arm    |
| Stop treatment for AE D | T61 | Set AE event rate for event D to 10 000, activate stop treatment for event D | Rate: 0.1<br>Stop treatment: No | Rate: 10 000<br>Stop treatment: Yes                                                                       | (1) Intervention should be stopped almost immediately (2) The results should be the same in both treatment arms with the exception of AE-related results | No time on treatment, results similar.<br>More transplants in intervention arm    |
| Stop treatment for AE E | T62 | Set AE event rate for event E to 10 000, activate stop treatment for event E | Rate: 0.1<br>Stop treatment: No | Rate: 10 000<br>Stop treatment: Yes                                                                       | (1) Intervention should be stopped almost immediately (2) The results should be the same in both treatment arms with the exception of AE-related results | No time on treatment, results similar.<br>More transplants in intervention arm    |
| Discount rate           | T63 | Set discount rate to 10%                                                     | Discount rate: 0.0%             | Discount rate: 10%                                                                                        | All costs should be less compared to the BC                                                                                                              | All costs less compared to the BC                                                 |
| Time horizon 1 years    | T64 | Set time horizon to 1 years                                                  | Time horizon: 10 yrs.           | Time horizon: 1 yr.                                                                                       | (1) Event/mortality rates should be lower than BC (2) LY should be less than 1 (3) costs should be less vs. BC                                           | 1) Events & Mortality lower than BC<br>2) LY less than 1. 3) Costs lower than BC. |
| Time horizon 5 years    | T65 | Set time horizon to 5 years                                                  | Time horizon: 10 yrs.           | Time horizon: 5 yrs.                                                                                      | (1) Event rates should be similar to the BC (2) LY should be less than 5 (3) costs should be less vs. BC                                                 | Event rates similar to BC, LY < 5, costs lower than BC                            |
| Time horizon 20 years   | T66 | Set time horizon to 20 years                                                 | Time horizon: 10 yrs.           | Time horizon: 20 yrs.                                                                                     | (1) Event rates should be similar to the BC (2) LY should be less than 20 (3) costs should be higher vs. BC                                              | Approx. Similar event rates to BC, LY lower than 20, costs higher than BC         |
| <b>Costs</b>            |     |                                                                              |                                 |                                                                                                           |                                                                                                                                                          |                                                                                   |
| Event costs             | T67 | Test Event Costs and Cum Incidence Match                                     | BC Costs                        | Set all costs to 0. Then set event costs to 1 for MI, HF, stroke, dialysis, and CV death. No discounting. | (1) Costs should match cumulative incidence for each of the selected outcomes                                                                            | Cost matches                                                                      |

AE adverse event, BC base case, CKD chronic kidney disease, CREDENCE Canagliflozin and Renal Endpoints in Diabetes with Established Nephropathy Clinical Evaluation, CV cardiovascular, DKD diabetic kidney disease, DoSCr doubling of serum creatinine, eGFR estimated glomerular filtration rate, HF heart failure, HHF hospitalization for heart failure, HR hazard ratio, LY life-year, MI myocardial infarction, PBO placebo, SoC standard of care, UACR urine albumin:creatinine ratio

**Table S14. Baseline Patient Characteristics for the CANVAS Program Subgroup**

|                      | CANVAS Program Subgroup |        | CREDESCENCE |        |
|----------------------|-------------------------|--------|-------------|--------|
|                      | N = 567                 |        | N = 4,401   |        |
|                      | Mean                    | SD     | Mean        | SD     |
| Age                  | 64.500                  | 7.940  | 63.019      | 9.199  |
| Females (proportion) | 0.302                   | 0.459  | 0.339       | 0.474  |
| Smokers (proportion) | 0.164                   | 0.371  | 0.145       | 0.352  |
| Diabetes duration    | 16.200                  | 7.940  | 15.783      | 8.629  |
| eGFR                 | 59.000                  | 16.300 | 56.178      | 18.244 |
| ln(UACR)             | 7.053                   | 7.085  | 6.791       | 1.019  |
| MI (proportion)      | 0.277                   | 0.448  | 0.100       | 0.301  |
| Stroke (proportion)  | 0.162                   | 0.369  | 0.104       | 0.305  |
| HF (proportion)      | 0.164                   | 0.371  | 0.148       | 0.355  |

CANVAS CANagliflozin cardioVascular Assessment Study, CREDESCENCE Canagliflozin and Renal Endpoints in Diabetes with Established Nephropathy Clinical Evaluation, eGFR estimated glomerular filtration rate, HF heart failure, MI myocardial infarction, SD standard deviation, UACR urine albumin:creatinine ratio

**Table S15. HRs in the CANVAS Program Subgroup**

|                              | <b>CANAVS Program Subgroup</b> |
|------------------------------|--------------------------------|
| <b>Outcomes</b>              | <b>HR</b>                      |
| 1st in trial nonfatal MI     | 0.500                          |
| 1st in trial nonfatal stroke | 1.263                          |
| HHF                          | 0.689                          |
| All-cause mortality          | 0.764                          |
| CV death                     | 0.892                          |
| Doubling of serum creatinine | 0.600                          |
| Dialysis                     | N/A                            |

CANVAS CANagliflozin cardioVascular Assessment Study, CV cardiovascular, HHF hospitalization for heart failure, HR hazard ratio, MI myocardial infarction, N/A not applicable

## Numerical Examples for Programmers

To ensure reproducibility, we present sample calculations of one-year (365.25 day) risk for nonfatal MI which uses the Exponential parametric form and HHF which uses the Weibull parametric form. As typical of DES models, the formula is based on the cumulative hazard  $\hat{H}(t)$  and the probability  $\hat{P}(t_0, t_1)$  of an event occurring in the interval  $(t_0, t_1)$  is calculated as  $\hat{P}(t_0, t_1) = 1 - \exp(\hat{H}(t_1) - \hat{H}(t_0))$ .

For the exponential model, the cumulative hazard was defined as  $\hat{H}_{exp}(t) = t \prod \beta_i^{X_i}$ , where  $\beta_i$  are the coefficients (including intercept) and  $X_i$  are the covariates. For the Weibull model, the cumulative hazard was defined as  $\hat{H}_{Weib}(t) = t^\rho \prod \beta_i^{X_i}$ , where  $\rho$  is the shape parameter. For covariates that vary during the interval, the cumulative hazard is calculated piecewise across sub-intervals.

We illustrate numerically assuming the risk corresponds to a female with the following characteristics evaluated at the simulation baseline: diagnosed with diabetes at age 50 years, diabetes duration of 5 years at baseline, smoker at baseline, history of myocardial infarction (MI), history of stroke, history of heart failure (HF), estimated glomerular filtration rate (eGFR) between 45 and 60 mL/min/1.73 m<sup>2</sup> at baseline, and urinary albumin:creatinine ratio (UACR) above 300 mg/g at baseline.

Estimated probability of nonfatal MI in the year is calculated as follows:

$$\hat{H}_{MI}(t_0) = 365.25 \times 5 \times 2.97 \times 10^{-5} \times 1.003^{50} \times 1.276 \times 1.932 \times 3.584 \times 1.124 \\ \times 0.732 \times 0.564 \times 1.213 \approx 0.313$$

$$\hat{H}_{MI}(t_1) = 365.25 \times (5 + 1) \times 2.97 \times 10^{-5} \times 1.003^{50} \times 1.276 \times 1.932 \times 3.584 \times 1.124 \\ \times 0.732 \times 0.564 \times 1.213 \approx 0.376$$

$$\hat{P}_{MI}(t_0, t_1) = 1 - \exp(\hat{H}_{MI}(t_1) - \hat{H}_{MI}(t_0)) \approx 1 - \exp(0.376 - 0.313) \approx 0.0607$$

Estimated probability of hospitalization for heart failure (HHF) in the year is calculated as follows:

$$\hat{H}_{HHF}(t_0) = 365.25 \times 5 \times 1.45 \times 10^{-7} \times 1.023^{50} \times 0.996 \times 1.416 \times 2.161 \times 1.064 \\ \times 2.253 \times 0.799 \times 2.347 \approx 0.273$$

$$\hat{H}_{HHF}(t_1) = 365.25 \times (5 + 1) \times 1.45 \times 10^{-7} \times 1.023^{50} \times 0.996 \times 1.416 \times 2.161 \times 1.064 \\ \times 2.253 \times 0.799 \times 2.347 \approx 0.354$$

$$\hat{P}_{HHF}(t_0, t_1) = 1 - \exp(\hat{H}_{HHF}(t_1) - \hat{H}_{HHF}(t_0)) \approx 1 - \exp(0.354 - 0.273) \approx 0.0778$$
